# Supplementary material for: Facile self-templating preparation of polyacrylonitrile-derived hierarchical porous carbon nanospheres for high-performance supercapacitors
Source: Royal Society of Chemistry journal article supplement (doi:10.1039/c5ra27000f), 2016-01-01
Supplement: c5ra27000f1.pdf [file c5ra27000f1.pdf]

**Electronic Supplementary Information (ESI)**

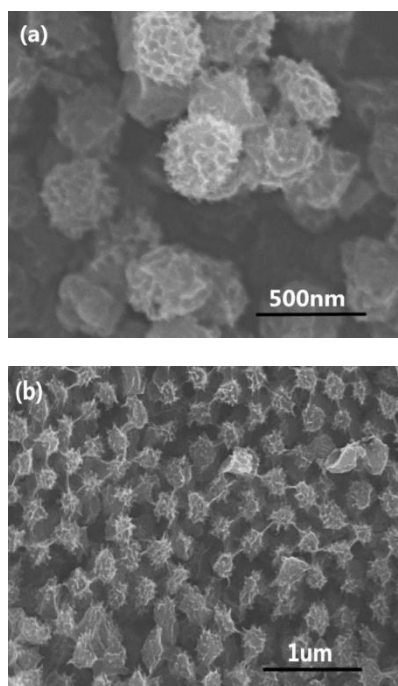

Figure S1 Morphology of as-prepared materials: SEM images of a) HPCNs-750 and b) HPCNs-850.

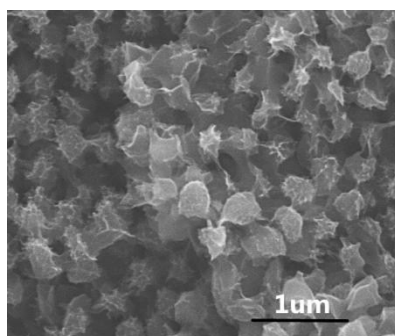

Figure S2 The SEM image of HPCN-850 after 3000 cycles.
